# Supplementary material
Source: PubMed Central journal article supplement (PMC3412369)
Supplement: NIHMS391387-supplement-S2A.pdf [file NIHMS391387-supplement-S2A.pdf]

**Table S2A. HMR expansion in blood cell methylomes**

**HMRs spanning promoters (-4kbp to 4kbp)**

**HMRs overlapping promoters, expanded one cell relative to the other**

|                   |                     | <b>Extension Sizes</b> |             |               |           |
|-------------------|---------------------|------------------------|-------------|---------------|-----------|
|                   |                     | <b>HMRs</b>            | <b>Mean</b> | <b>Median</b> | <b>SD</b> |
| <b>B cell</b>     | <b>5' Extension</b> | 2716                   | 101.3       | 23            | 215.9     |
|                   | <b>3' Extension</b> | 3274                   | 174.2       | 63            | 418.2     |
| <b>Neutrophil</b> | <b>5' Extension</b> | 4716                   | 108.1       | 41.5          | 190.6     |
|                   | <b>3' Extension</b> | 4905                   | 140         | 55            | 263.2     |

**Cell specific HMRs overlapping promoters**

|                   | <b>Total</b> | <b>#3'</b> | <b>Position</b> |               |
|-------------------|--------------|------------|-----------------|---------------|
|                   |              |            | <b>Mean</b>     | <b>Median</b> |
| <b>B cell</b>     | 125          | 78         | 585.2           | 531           |
| <b>Neutrophil</b> | 113          | 68         | 428.7           | 435.5         |

**#3'**: Number of HMRs with center 3' of TSS

**Position**: Position of HMR center from TSS
