# Supplementary material
Source: PubMed Central journal article supplement (PMC3412369)
Supplement: NIHMS391387-supplement-S2C.pdf [file NIHMS391387-supplement-S2C.pdf]

**Table S2C. RNA PolIII enrichment ratio (B cell over neutrophil) at expanded HMRs**

|                     | <b>B cell expanded</b> | <b>Neut expanded</b> | <b>Ratio</b> |
|---------------------|------------------------|----------------------|--------------|
| <b>PolIII reads</b> | 44,414                 | 38,141               |              |
| <b>Regions</b>      | 1,012                  | 2,115                |              |
| <b>Region size</b>  | 2,453                  | 3,008                |              |
| <b>Reads/region</b> | 13                     | 10                   |              |
| <b>Bases</b>        | 2,482,313              | 6,361,933            |              |
| <b>Reads/base</b>   | 0.0178922              | 0.0059952            | 2.98         |
